# Supplementary material
Source: ML conference proceedings conference paper supplement (https://openreview.net/forum?id=f69lH790GZ)
Supplement: supplementary_material [file attachment]

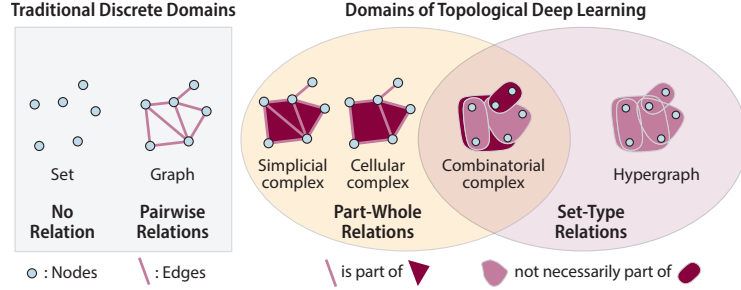

Figure 6: **Topological Deep Learning Domains.** Nodes in blue, (hyper)edges in pink, and faces in dark red. Figure adopted from Papillon et al. (2023).

## A DOMAINS OF TOPOLOGICAL DEEP LEARNING

We summarize the different discrete domains leveraged within TDL and, in doing so, contextualize how combinatorial complexes generalize all of them. To that end, we will closely follow the description of Papillon et al. (2023), using as well its very clarifying Figure 6. We recommend this survey for a high-level overview of TDL literature, and the more extensive work of Hajij et al. (2023) for a detailed mathematical formulation of the field. From left to right in Figure 6, the different domains in TDL are:

### TRADITIONAL DISCRETE DOMAINS

**Set / Pointcloud.** A collection of points called *nodes* without any additional structure.

**Graph.** A set of points (nodes) connected with edges that denote pairwise relationships.

### SET + PART-WHOLE RELATIONS

**Simplicial Complex.** A generalization of a graph that incorporates hierarchical part-whole relations through the multi-scale construction of cells. Nodes are rank 0-cells that can be combined to form edges (rank 1 cells). Edges are, in turn, combined to form faces (rank 2 cells), which are combined to form volumes (rank 3 cells), and so on. In particular, each cell  $\sigma$  in a simplicial complex must contain all lower dimensional cells  $\tau$  such that  $\tau \subseteq \sigma$ . Therefore, faces must be triangles, volumes must be tetrahedrons, and so forth.

**Cellular Complex.** A generalization of an simplicial complex in which cells are not limited to simplexes, but may instead take any shape: faces can involve more than three nodes, volumes more than four faces, and so on. This flexibility endows CCs with greater expressivity than simplicial complexes (Bodnar et al., 2021a), but still edges only connect pairs of nodes.

### SET + SET-TYPE RELATIONS

**Hypergraph:** A generalization of a graph, in which higher-order edges called hyperedges can connect arbitrary sets of two or more nodes. Connections in HGs represent set-type relationships, in which participation in an interaction is not implied by any other relation in the system. This makes HGs an ideal choice for data with abstract and arbitrarily large interactions of equal importance, such as semantic text and citation networks.

### SET + PART-WHOLE AND SET-TYPE RELATIONS

**Combinatorial Complex:** A structure that combines features of hypergraphs and cellular complexes. Like a hypergraph, edges may connect any number of nodes. Like a cellular complex, cells can be combined to form higher-ranked structures. Hence, combinatorial complexes generalize all other topological domains.

## B PROOFS

### B.1 PROOF OF GENERALITY

The proof is straightforward. It is sufficient to set  $\omega_{\mathcal{N}}(\mathbf{H}_{\mathcal{N}}^l, \mathcal{G}_{\mathcal{N}})$  to  $\{\bigoplus_{y \in \mathcal{N}(\sigma)} \psi_{\mathcal{N}, \text{rk}(\sigma)}(\mathbf{h}_{\sigma}^l, \mathbf{h}_{\tau}^l)\}_{\sigma \in \mathcal{C}}$  in (8) as all  $y \in \mathcal{N}(\sigma)$  are part of the node set  $\mathcal{C}_{\mathcal{N}}$  of the strictly augmented Hasse graph of  $\mathcal{N}$  by definition.

### B.2 PROOF OF EQUIVARIANCE

As for GNNs, an amenable property for GCCNNs is the awareness w.r.t. relabeling of the cells. In other words, given that the order in which the cells are presented to the networks is arbitrary -because CCs, like (undirected) graphs, are purely combinatorial objects-, one would expect that if the order changes, the output changes accordingly. To formalize this concept, we need the following notions.

**Matrix Representation of a Neighborhood.** Assume again to have a combinatorial complex  $\mathcal{C}$  containing  $C := |\mathcal{C}|$  cells and a neighborhood function  $\mathcal{N}$  on it. Assume again to give an arbitrary labeling to the cells in the complex, and denote the  $i$ -th cell with  $\sigma_i$ . The matrix representation of the neighborhood function is a matrix  $\mathbf{N}_{\mathcal{N}} \in \mathbb{R}^{C \times C}$  such that  $\mathbf{N}_{i,j} = 1$  if the  $\sigma_j \in \mathcal{N}(\sigma_i)$  or zero otherwise. We notice that the submatrix  $\tilde{\mathbf{N}}_{\mathcal{N}} \in \mathbb{R}^{|\mathcal{C}_{\mathcal{N}}| \times |\mathcal{C}_{\mathcal{N}}|}$  obtained by removing all the zero rows and columns is the adjacency matrix of the strictly augmented Hasse graph  $\mathcal{G}_{\mathcal{C}_{\mathcal{N}}}$  induced by  $\mathcal{N}$ .

**Permutation Equivariance.** Let  $\mathcal{C}$  be combinatorial complex,  $\mathcal{N}_{\mathcal{C}}$  a collection of neighborhoods on it, and  $\mathbf{N} = \{\mathbf{N}_{\mathcal{N}}\}_{\mathcal{N} \in \mathcal{N}_{\mathcal{C}}}$  the set collecting the corresponding neighborhood matrices. Let  $\mathbf{P} \in \mathbb{R}^{C \times C}$  be a permutation matrix. Finally, denote by  $\mathbf{P}\mathbf{H}$  the permuted embeddings and by  $\{\mathbf{P}\mathbf{N}_{\mathcal{N}}\mathbf{P}^T\}_{\mathcal{N} \in \mathcal{N}_{\mathcal{C}}}$ , the permuted neighborhood matrices. We say that a function  $f: (\mathbf{H}^l, \mathbf{B}) \mapsto \mathbf{H}^{l+1}$  is cell permutation equivariant if  $f(\mathbf{P}\mathbf{H}^l, \{\mathbf{P}\mathbf{N}_{\mathcal{N}}\mathbf{P}^T\}_{\mathcal{N} \in \mathcal{N}_{\mathcal{C}}}) = \mathbf{P}f(\mathbf{H}^l, \{\mathbf{N}_{\mathcal{N}}\}_{\mathcal{N} \in \mathcal{N}_{\mathcal{C}}})$  for any permutation matrix  $\mathbf{P}$ . Intuitively, the permutation matrix changes the arbitrary labeling of the cells, and a permutation equivariant function is a function that reflects the change in its output.

*Proof of Proposition 2.* We follow the approach from (Bodnar et al., 2021a). Given any permutation matrix  $\mathbf{P}$ , for a cell  $\sigma_i$ , let us denote its permutation as  $\sigma_{\mathbf{P}(i)}$  with an abuse of notation. Let  $\mathbf{h}_{\sigma_i}^{l+1}$  be the output embedding of cell  $\sigma_i$  for the  $l$ -th layer of a GCCN taking  $(\mathbf{H}^l, \{\mathbf{N}_{\mathcal{N}}\}_{\mathcal{N} \in \mathcal{N}_{\mathcal{C}}})$  as input, and  $\mathbf{h}_{\sigma_{\mathbf{P}(i)}}^{l+1}$  be the output embedding of cell  $\sigma_{\mathbf{P}(i)}$  for the same GCCN layer taking  $(\mathbf{P}\mathbf{H}^l, \{\mathbf{P}\mathbf{N}_{\mathcal{N}}\mathbf{P}^T\}_{\mathcal{N} \in \mathcal{N}_{\mathcal{C}}})$  as input. To prove the permutation equivariance, it is sufficient to show that  $\mathbf{h}_{\sigma_i}^{l+1} = \mathbf{h}_{\sigma_{\mathbf{P}(i)}}^{l+1}$  as the update function  $\phi$  is row-wise, i.e., it independently acts on each cell. To do so, we show that the (multi-)set of embeddings being passed to the neighborhood message function, aggregation, and update functions are the same for the two cells  $\sigma_i$  and  $\sigma_{\mathbf{P}(i)}$ . The neighborhood message functions act on the strictly augmented Hasse graph of  $\mathcal{G}_{\mathcal{C}_{\mathcal{N}}}$  of  $\mathcal{N}$ , thus we work with the submatrix  $\tilde{\mathbf{N}}_{\mathcal{N}}$ . The neighborhood message function is assumed to be *node* permutation equivariant, i.e., denoting again the embeddings of the cells in  $\mathcal{G}_{\mathcal{C}_{\mathcal{N}}}$  with  $\mathbf{H}_{\mathcal{C}_{\mathcal{N}}}^l \in \mathbb{R}^{|\mathcal{C}_{\mathcal{N}}| \times F^l}$  and identifying  $\mathcal{G}_{\mathcal{C}_{\mathcal{N}}}$  with  $\tilde{\mathbf{N}}_{\mathcal{N}}$ , it holds that  $\omega_{\mathcal{N}}(\mathbf{P}_{\mathcal{C}_{\mathcal{N}}} \mathbf{H}_{\mathcal{C}_{\mathcal{N}}}^l, \mathbf{P}_{\mathcal{C}_{\mathcal{N}}} \tilde{\mathbf{N}}_{\mathcal{N}} \mathbf{P}_{\mathcal{C}_{\mathcal{N}}}^T) = \mathbf{P}_{\mathcal{C}_{\mathcal{N}}} \omega_{\mathcal{N}}(\mathbf{H}_{\mathcal{C}_{\mathcal{N}}}^l, \tilde{\mathbf{N}}_{\mathcal{N}})$ , where  $\mathbf{P}_{\mathcal{C}_{\mathcal{N}}}$  is the submatrix of  $\mathbf{P}$  given by the rows and the columns corresponding to the cells in  $\mathcal{G}_{\mathcal{C}_{\mathcal{N}}}$ . This assumption, together with the assumption that the inter-neighborhood aggregation is assumed to be *cell* permutation invariant, i.e.  $\bigotimes_{\mathcal{N} \in \mathcal{N}_{\mathcal{C}}} \mathbf{P}_{\mathcal{C}_{\mathcal{N}}} \omega_{\mathcal{N}}(\mathbf{H}_{\mathcal{C}_{\mathcal{N}}}^l, \tilde{\mathbf{N}}_{\mathcal{N}}) = \bigotimes_{\mathcal{N} \in \mathcal{N}_{\mathcal{C}}} \omega_{\mathcal{N}}(\mathbf{H}_{\mathcal{C}_{\mathcal{N}}}^l, \tilde{\mathbf{N}}_{\mathcal{N}})$ , trivially makes the overall composition of the neighborhood message function with the inter-neighborhood aggregation *cell* permutation invariant. This fact, together with the fact that the (labels of) the neighbors of the cell  $\sigma_i$  in  $\mathcal{N}$  are given by the nonzero elements of the  $i$ -th row of  $\mathbf{N}_{\mathcal{N}}$ , or the corresponding row of  $\tilde{\mathbf{N}}_{\mathcal{N}}$ , and that the columns and rows of  $\tilde{\mathbf{N}}_{\mathcal{N}}$  are permuted in the same way the rows of the feature matrix  $\mathbf{H}_{\mathcal{C}_{\mathcal{N}}}^l$  are permuted, implies

$$[\tilde{\mathbf{N}}_{\mathcal{N}}]_{i,j} = [\mathbf{P}_{\mathcal{C}_{\mathcal{N}}} \tilde{\mathbf{N}}_{\mathcal{N}} \mathbf{P}_{\mathcal{C}_{\mathcal{N}}}^T]_{\mathbf{P}_{\mathcal{C}_{\mathcal{N}}}(i), \mathbf{P}_{\mathcal{C}_{\mathcal{N}}}(j)}, \quad (9)$$

thus that  $\sigma_i$  and  $\sigma_{\mathbf{P}(i)}$  receive the same neighborhood message from the neighboring cells in  $\mathcal{N}$ , for all  $\mathcal{N} \in \mathcal{N}_{\mathcal{C}}$ .

### B.3 PROOF OF EXPRESSIVITY

Before proving Proposition 3, we first recall the notion of homomorphism of a combinatorial complexes (CC) from (Hajij et al., 2023) and generalize it to the notion of isomorphism of combinatorial complexes.

**Definition 1** (CC-Homomorphism (Hajij et al., 2023)). A homomorphism from a  $CC(S_1, \mathcal{X}_1, \text{rk}_1)$  to a  $CC(S_2, \mathcal{X}_2, \text{rk}_2)$ , also called a CC-homomorphism, is a function  $f : \mathcal{X}_1 \rightarrow \mathcal{X}_2$  that satisfies the following conditions: 1. If  $x, y \in \mathcal{X}_1$  satisfy  $x \subseteq y$ , then  $f(x) \subseteq f(y)$ . 2. If  $x \in \mathcal{X}_1$ , then  $\text{rk}_1(x) \geq \text{rk}_2(f(x))$ .

**Definition 2** (CC-Isomorphism). A isomorphism from a  $CC(S_1, \mathcal{X}_1, \text{rk}_1)$  to a  $CC(S_2, \mathcal{X}_2, \text{rk}_2)$ , also called a CC-isomorphism, is an invertible CC-homomorphism whose inverse is also a CC-isomorphism.

Then, we propose three WL tests, called CCWL,  $k$ -CCWL and GCWL, tailored to the message passing schemes of CCNNs and GCNNs respectively. These tests rely on the color refinement schemes defined next. The main structure of the coloring schemes is the same, only the color update differs in the refinement steps.

**Definition 3** (Weisfeiler-Leman (WL) tests on combinatorial complexes). Let  $\mathcal{K}$  be a combinatorial complex. Let  $\mathcal{N}$  a neighborhood on  $\mathcal{K}$ . Given a sub-module  $\omega_{\mathcal{N}}$ , the  $\omega$ -neighborhood given by  $\mathcal{N}$  and  $\omega$  is the set of cells in  $|\mathcal{C}_{\mathcal{N}}|$  that contribute to the image of  $\omega_{\mathcal{N}}$ . The scheme proceeds as follows:

- Initialization: Cells  $\sigma$  are initialized with the same color.
- Refinement: Given the color  $c_{\sigma}^t$  of cell  $\sigma$  at iteration  $t$ , the refinement step computes its color at the next iteration  $c_{\sigma}^{t+1}$ .

- The Combinatorial Complex WL test (CCWL) test updates colors by injectively mapping the multi-sets of colors belonging to the cells of  $\sigma$  in the neighborhood  $\mathcal{N}$ , using a perfect HASH function:

$$c_{\sigma}^{t+1} = \text{HASH}(c_{\sigma}^t, c_{\mathcal{N}}^t(\sigma)). \quad (10)$$

- The Combinatorial Complex  $k$ -WL test ( $k$ -CCWL) test updates colors by injectively mapping the multi-sets of colors belonging to the cells of  $\sigma$  in the  $k$ -hop neighborhood associated with  $\mathcal{N}$ , using a perfect HASH function:

$$c_{\sigma}^{t+1} = \text{HASH}(c_{\sigma}^t, c_{\mathcal{N}}^t(\sigma), c_{\mathcal{N}^2}^t(\sigma), \dots, c_{\mathcal{N}^k}^t(\sigma)). \quad (11)$$

- The Generalized Combinatorial Complex WL test (GCWL) test updates colors by injectively mapping the multi-sets of colors belonging to the cells of  $\sigma$  in the  $\omega_{\mathcal{N}}$ -neighborhood of  $\mathcal{N}$ , using a perfect HASH function:

$$c_{\sigma}^{t+1} = \text{HASH}(c_{\sigma}^t, c_{\mathcal{N}_{\omega}}^t(\sigma)). \quad (12)$$

- Termination: The algorithm stops when an iteration leaves the coloring unchanged.

Two combinatorial complexes are deemed non-isomorphic according to the CCWL,  $k$ -CCWL, and GCWL respectively, if their color histograms differ upon termination of the scheme. If the histograms are the same, we cannot conclude.

We now provide the proof of Proposition 3.

*Proof.* We aim to prove that GCWL is strictly more powerful than CCWL in distinguishing non-isomorphic combinatorial complexes. Specifically, we demonstrate the existence of two combinatorial complexes  $\mathcal{K}_1$  and  $\mathcal{K}_2$  that are indistinguishable by CCWL but distinguishable by GCWL.

**Step 1: Relating CCWL,  $k$ -CCWL, and GCWL to Graph-Based WL Tests** To establish the relationship between these tests, we first note the following equivalences:

1. **CCWL Test:** The CCWL test on a combinatorial complex  $\mathcal{K}$  with neighborhood structure  $\mathcal{N}$  is equivalent to the classical WL test on the strictly augmented Hasse graph  $\mathcal{G}_{\mathcal{N}}(\mathcal{K})$ .

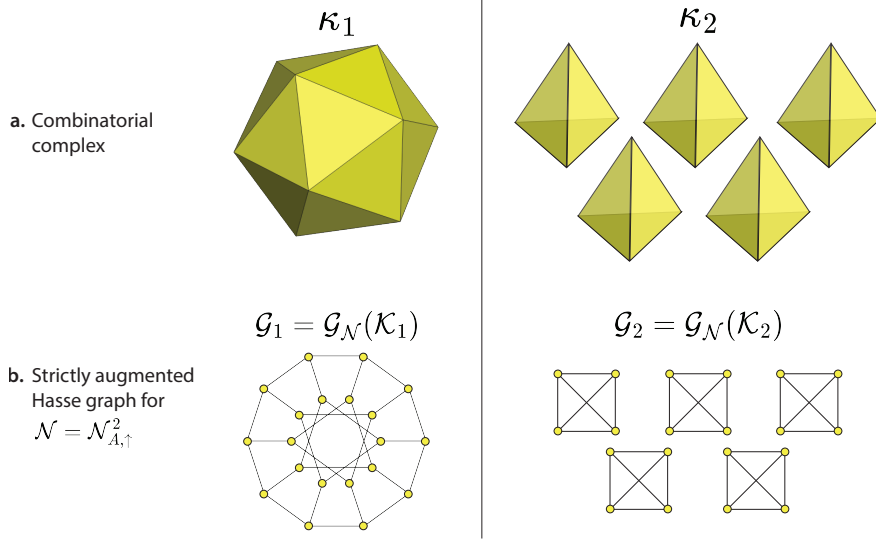

Figure 7: **a.** Pair of combinatorial complexes:  $\kappa_1$  is an icosahedron polygon, and  $\kappa_2$  is five tetrahedrons. **b.** Strictly augmented Hasse graphs corresponding to each combinatorial complex, given a choice of neighborhood  $\mathcal{N}_{A,\uparrow}^2$ .

2.  **$k$ -CCWL Test:** The  $k$ -CCWL test on  $\mathcal{K}$  with  $\mathcal{N}$  corresponds to the  $k$ -WL test on the strictly augmented Hasse graph  $\mathcal{G}_{\mathcal{N}}(\mathcal{K})$ .
3. **GCWL Test Generality:** The GCWL test subsumes the  $k$ -CCWL test as a special case by choosing a submodule  $\omega_{\mathcal{N}}$  that performs exactly  $k$  message-passing steps over the neighborhood  $\mathcal{N}$ .

These equivalences establish that results on graph-based WL tests directly inform the relative expressive power of CCWL,  $k$ -CCWL, and GCWL.

**Step 2: Existence of Indistinguishable Complexes under CCWL** Let  $\mathcal{K}_1$  and  $\mathcal{K}_2$  be two combinatorial complexes with a neighborhood structure  $\mathcal{N}_{\mathcal{C}} = \mathcal{N}_{A,\downarrow}^2$  (down-adjacency of faces). These complexes are illustrated in Figure 7a.

The corresponding strictly augmented Hasse graphs  $\mathcal{G}_1$  and  $\mathcal{G}_2$  (Fig. 7b) represent the 20 faces of each complex as nodes, where each node has degree 3. Thus:

- Both  $\mathcal{G}_1$  and  $\mathcal{G}_2$  are 3-regular graphs.
- By definition, 3-regular graphs are indistinguishable by the WL test.

Since CCWL is equivalent to WL on  $\mathcal{G}_{\mathcal{N}}$  (from Step 1), the two complexes  $\mathcal{K}_1$  and  $\mathcal{K}_2$  are indistinguishable by CCWL.

**Step 3: Distinguishability of  $\mathcal{K}_1$  and  $\mathcal{K}_2$  under GCWL** It is known that the  $k$ -WL test is strictly more powerful than the WL test for  $k > 1$ . Specifically, there exist graphs (such as  $\mathcal{G}_1$  and  $\mathcal{G}_2$ ) that are indistinguishable by WL but distinguishable by  $k$ -WL for sufficiently large  $k$ . By the equivalences established in Step 1, these graphs are also distinguishable by the  $k$ -CCWL test.

Now, consider a GCCN equipped with a submodule  $\omega_{\mathcal{N}}$  that performs  $k > 1$  message-passing steps on the neighborhood  $\mathcal{N} = \mathcal{N}_{A,\downarrow}^2$ . The GCWL test, which generalizes  $k$ -CCWL, can distinguish between  $\mathcal{G}_1$  and  $\mathcal{G}_2$ . Consequently:

- GCWL can distinguish between  $\mathcal{K}_1$  and  $\mathcal{K}_2$ .

**Step 4: Conclusion** We have constructed two combinatorial complexes  $\mathcal{K}_1$  and  $\mathcal{K}_2$  that:

1. Are indistinguishable by CCWL (or equivalently, WL on their strictly augmented Hasse graphs).
2. Are distinguishable by GCWL (or equivalently,  $k$ -WL for  $k > 1$  on their strictly augmented Hasse graphs).

Since GCWL is capable of distinguishing  $\mathcal{K}_1$  and  $\mathcal{K}_2$  while CCWL is not, GCWL is strictly more powerful than CCWL for distinguishing non-isomorphic combinatorial complexes.  $\square$

## C TIME COMPLEXITY

To analyze the time complexity (in terms of FLOPs) of the Generalized Combinatorial Complex Neural Network (GCCN), we derive the complexity of its submodule  $\omega_{\mathcal{N}}$  and then compute the complexity of a GCCN layer. We then compare it with GNN and CCNN complexity.

### C.1 KEY DEFINITIONS

- **Message Complexity ( $M$ ):** The complexity of a single message computation along a route (e.g., node  $\rightarrow$  node). For example, in a Graph Convolutional Network (GCN), a single message is defined as:

$$m_{x \rightarrow y} = a_{xy} \mathbf{h}_y \Theta,$$

where  $\mathbf{h}_y$  is a  $1 \times F$  vector,  $\Theta$  is an  $F \times F$  weight matrix, and  $a_{xy}$  is a scalar. This involves a matrix-vector multiplication, contributing a complexity of  $O(F^2)$  per message.

- **Update Complexity ( $U$ ):** The complexity of the update function in the reference GNN. For simplicity, we assume the update is an element-wise function, giving  $U = O(|N|)$ , where  $|N|$  is the number of nodes.

### C.2 COMPLEXITY OF $\omega_{\mathcal{N}}$

Assuming each  $\omega_{\mathcal{N}}$  submodule is a single-layer GNN, the complexity of  $\omega_{\mathcal{N}}$  can be decomposed into three components: **message computation, aggregation, and update.**

$$C_{\omega_{\mathcal{N}}} = C_{\text{message}} + C_{\text{aggregation}} + C_{\text{update}}$$

This breaks down as:

$$C_{\omega_{\mathcal{N}}} = 2|E|M + \sum_{n \in N} \deg(n)A + |N|U,$$

where:

- $|E|$ : Number of edges in the graph,
- $M$ : Complexity per message ( $O(F^2)$ ),
- $\deg(n)$ : Degree of node  $n$ ,
- $A$ : Complexity of aggregation (e.g., assuming sum/average,  $O(F)$ ),
- $U$ : Complexity of the update function ( $O(1)$  per node).

Substituting assumptions for convolutional message passing, summation aggregation, and constant node degree  $d$ :

$$C_{\omega_{\mathcal{N}}} = 2|E|F^2 + \sum_{n \in N} \deg(n)F + O(|N|),$$

$$C_{\omega_{\mathcal{N}}} = 2|E|F^2 + |N|dF + O(|N|),$$

$$C_{\omega_{\mathcal{N}}} = O(|E|F^2 + |N|dF + |N|).$$

### C.3 COMPLEXITY USING COMBINATORIAL COMPLEX NOTATIONS

Up until now, we have expressed  $C_{\omega_{\mathcal{N}}}$  in terms of the nodes and edges making up the strictly expanded Hasse graph it receives as input. To be able to write the complexity of a whole GCCN layer, we must express  $C_{\omega_{\mathcal{N}}}$  in terms of the original cells represented as nodes in the graph. Specifically, we will denote the source cells (cells sending messages) as cells of rank  $r$  and the destination cells (cells receiving messages) as cells of rank  $r'$ . The relationships governing adjacency between the nodes representing these cells will come from the neighborhood  $\mathcal{N}$  to which the submodule  $\omega_{\mathcal{N}}$  is assigned.

Rewriting in terms of combinatorial complex notations, where:

- $\|\mathcal{N}\|_0$ : Total number of relationships in  $\mathcal{N}$  (i.e. number of nonzero entries in matrix corresponding to  $\mathcal{N}$ ),
- $n_{r'}$ : Number of  $r'$ -cells.
- $d_{r'}$ : Assumed constant degree of  $r'$ -cells,

The complexity becomes:

$$C_{\omega_{\mathcal{N}}} = O(\|\mathcal{N}\|_0 F^2 + \text{nrows}(\mathcal{N}) d_{r'} F + n_{r'}),$$

$$C_{\omega_{\mathcal{N}}} = O(\|\mathcal{N}\|_0 F^2 + \text{nrows}(\mathcal{N}) d_{r'} F + \text{nrows}(\mathcal{N})).$$

#### C.4 COMPLEXITY OF A GCCN LAYER

A GCCN layer is composed of a set of  $\omega_{\mathcal{N}}$ 's, one for each  $\mathcal{N} \in \mathcal{N}_{\mathcal{C}}$ . The complexity of a GCCN layer is the sum of all the complexities of its submodules, plus the complexity of the module responsible for aggregating the outputs of each neighborhood, i.e. the inter-neighborhood aggregation. We assume this inter-aggregation to be a sum. The layer complexity is:

$$C_{\text{GCCN}} = \sum_{\mathcal{N} \in \mathcal{N}_{\mathcal{C}}} C_{\omega_{\mathcal{N}}} + C_{\text{inter-agg}},$$

where:

$$C_{\text{inter-agg}} = \sum_{r' \in [0, R']} n_{r'} n_{\mathcal{N}_{r'}} F,$$

and  $n_{\mathcal{N}_{r'}}$  is the number of neighborhoods sending messages to  $r'$ -cells.

#### C.5 TAKEAWAYS

- **GNN Comparison:** GCCNs increase complexity compared to traditional GNNs due to :
  - the introduction of multiple neighborhoods. A GCCN considers many  $\mathcal{N} \in \mathcal{N}_{\mathcal{C}}$ , going beyond the simple node-level adjacency  $\mathcal{N}_{\mathcal{C}} = \mathcal{A}_0$  of a GNN. This is what allows TDL models (GCCNs and CCNNs) to operate on a richer topological space than GNNs.
  - inter-neighborhood aggregation.
- **CCNN Comparison:** Unlike traditional CCNNs, GCCNs allow per-rank neighborhoods, enabling many smaller possible sets of neighborhoods  $\mathcal{N}_{\mathcal{C}}$ . This more selective inclusion of neighborhoods reduces redundancy. Concretely, this means the sum  $\sum_{\mathcal{N} \in \mathcal{N}_{\mathcal{C}}} C_{\omega_{\mathcal{N}}}$  can be smaller.
- **Tradeoff:** GCCNs' time complexity are a compromise between GNNs and CCNNs. While they do introduce  $C_{\text{inter-agg}}$  (like CCNNs) and additional elements to the sum  $\sum_{\mathcal{N} \in \mathcal{N}_{\mathcal{C}}} C_{\omega_{\mathcal{N}}}$ , they can introduce less elements to this sum than CCNNs.

## D SOFTWARE

Algorithm 1 shows how the TopoTune module instantiates a GCCN by taking a choice of model  $\omega_{\mathcal{N}}$  and neighborhoods  $\mathcal{N}_{\mathcal{C}}$  as input. Given an input complex  $x$ , TopoTune first expands it into an ensemble of strictly augmented Hasse graphs that are then passed to their respective  $\omega_{\mathcal{N}}$  models within each GCCN layer.

*Remark.* We decided to design the software module of TopoTune, i.e., how to implement GCCNs, as we did for mainly two reasons: (i) the full compatibility with TopoBenchmark (implying consistency of the combinatorial complex instantiations and the benchmarking pipeline), and (ii) the possibility of using GNNs as neighborhood message functions that are not necessarily implemented with a specific library. However, if the practitioner is interested in entirely wrapping the GCCN implementation into Pytorch Geometric or DGL, they can do it by noticing that a GCCN is equivalent to a *heterogeneous* GNN where the heterogeneous graph the whole augmented Hasse graph, with node types given by the rank of the cell (e.g. 0-cells, 1-cells, and 2-cells) while the edge type is given by the per-rank neighborhood function (e.g. "0-cells to 1-cells" or "2-cells to 1-cells" for  $\mathcal{N}_{I,\uparrow}^0$  and  $\mathcal{N}_{I,\downarrow}^2$ , respectively).

---

### Algorithm 1 TopoTune

---

```

Class TopoTune(torch.nn.Module):
1: procedure INIT(neighborhoods,  $\omega_n$ ,  $\omega_n\_params$ , layers)
2:    $self.omega\_n\_submodels \leftarrow []$ 
3:   for  $l \leftarrow 1$  to layers do
4:      $layer\_models \leftarrow []$ 
5:     for each  $nb$  in neighborhoods do
6:        $model \leftarrow \omega_n(\omega_n\_params)$ 
7:        $layer\_models.append(model)$ 
8:     end for
9:      $self.omega\_n\_submodels.append(layer\_models)$ 
10:  end for
11: end procedure
12: procedure FORWARD( $x$ )
13:  for each layer in  $self.omega\_n\_submodels$  do
14:     $outputs \leftarrow []$ 
15:    for each  $\omega_n\_model$  in layer do
16:       $hasse\_graph \leftarrow self.expand\_to\_strictly\_aug\_hasse\_graph(x)$ 
17:       $outputs.append(\omega_n\_model(hasse\_graph))$ 
18:    end for
19:     $x \leftarrow self.aggregate\_rank\_wise(outputs)$ 
20:  end for
21:  return  $x$ 
22: end procedure
```

#### Example Instantiation:

```

23:  $neighborhoods \leftarrow [[[0, 0], up\_adjacency], [[2, 1], incidence]]$ 
24:  $\omega_n \leftarrow torch\_geometric.nn.models.GAT$ 
25:  $\omega_n\_params \leftarrow \{num\_layers : 2, heads : 4\}$ 
26:  $layers \leftarrow 4$ 
27:  $model \leftarrow TopoTune(neighborhoods, \omega_n, \omega_n\_params, layers)$ 
```

---



## E ADDITIONAL DETAILS ON EXPERIMENTS

In this section, we delve into the details of the datasets, hyperparameter search methodology, and computational resources utilized for conducting the experiments.

### E.1 NEIGHBORHOOD STRUCTURES

In order to build a broad class of GCCNs, we consider  $X$  different neighborhood structures on which we perform graph expansion. Importantly, three of these structures are lightweight, per-rank neighborhood structures, as proposed in Section 4. The neighborhood structures are:

$$\begin{aligned} & \left\{ \mathcal{N}_{A,\uparrow}^0, \mathcal{N}_{A,\uparrow}^1 \right\} \quad \left\{ \mathcal{N}_{A,\uparrow}^0, \mathcal{N}_{I,\downarrow}^2 \right\} \quad \{ \mathcal{N}_{A,\uparrow}, \mathcal{N}_{I,\uparrow} \} \quad \{ \mathcal{N}_{A,\uparrow}, \mathcal{N}_{A,\downarrow}, \mathcal{N}_{I,\downarrow} \} \quad \{ \mathcal{N}_{A,\uparrow} \} \\ & \left\{ \mathcal{N}_{A,\uparrow}, \mathcal{N}_{A,\downarrow}^1 \right\} \quad \{ \mathcal{N}_{A,\uparrow}, \mathcal{N}_{A,\downarrow} \} \quad \{ \mathcal{N}_{A,\uparrow}, \mathcal{N}_{I,\downarrow} \} \quad \{ \mathcal{N}_{A,\uparrow}, \mathcal{N}_{A,\downarrow}, \mathcal{N}_{I,\uparrow} \} \quad \{ \mathcal{N}_{A,\uparrow}, \mathcal{N}_{A,\downarrow}, \mathcal{N}_{I,\downarrow}, \mathcal{N}_{I,\uparrow} \} \end{aligned}$$

### E.2 DATASETS

Table 3 provides the statistics for each dataset lifted to three topological domains: simplicial complex, cellular complex, and hypergraph. The table shows the number of 0-cells (nodes), 1-cells (edges), and 2-cells (faces) of each dataset after the topology lifting procedure. We recall that:

- the simplicial clique complex lifting is applied to lift the graph to a simplicial domain, with a maximum complex dimension equal to 2;
- the cellular cycle-based lifting is employed to lift the graph into the cellular domain, with maximum complex dimension set to 2 as well.

Table 3: Descriptive summaries of the datasets used in the experiments.

| Dataset       | Domain     | # 0-cell | # 1-cell | # 2-cell |
|---------------|------------|----------|----------|----------|
| Cora          | Cellular   | 2,708    | 5,278    | 2,648    |
|               | Simplicial | 2,708    | 5,278    | 1,630    |
| Citeseer      | Cellular   | 3,327    | 4,552    | 1,663    |
|               | Simplicial | 3,327    | 4,552    | 1,167    |
| PubMed        | Cellular   | 19,717   | 44,324   | 23,605   |
|               | Simplicial | 19,717   | 44,324   | 12,520   |
| MUTAG         | Cellular   | 3,371    | 3,721    | 538      |
|               | Simplicial | 3,371    | 3,721    | 0        |
| NCI1          | Cellular   | 122,747  | 132,753  | 14,885   |
|               | Simplicial | 122,747  | 132,753  | 186      |
| NCI109        | Cellular   | 122,494  | 132,604  | 15,042   |
|               | Simplicial | 122,494  | 132,604  | 183      |
| PROTEINS      | Cellular   | 43,471   | 81,044   | 38,773   |
|               | Simplicial | 43,471   | 81,044   | 30,501   |
| ZINC (subset) | Cellular   | 277,864  | 298,985  | 33,121   |
|               | Simplicial | 277,864  | 298,985  | 769      |

### E.3 HYPERPARAMETER SEARCH

Five splits are generated for each dataset to ensure a fair evaluation of the models across domains. Each split comprises 50% training data, 25% validation data, and 25% test data. An exception is made for the ZINC dataset, where predefined splits are used (Irwin et al., 2012).

To avoid the combinatorial explosion of possible hyperparameter sets, we fix the values of all hyperparameters beyond GCCNs: hence, to name a few relevant parameters, we set the learning

rate to 0.01, the batch size to the default value of TopoBenchmark for each dataset, and the cell hidden state dimension to 32. Regarding the internal GCCN hyperparameters, a grid-search strategy is employed to find the optimal set for each model and dataset. Specifically, we consider 10 different neighborhood structures (see Section E.1), and the number of GCCN layers is varied over  $\{2, 4, 8\}$ . For GNN-based neighborhood message functions, we vary over  $\{\text{GCN}, \text{GAT}, \text{GIN}, \text{GraphSage}\}$  models from PyTorch Geometric, and for each of them consider either 1 or 2 number of layers. For the Transformer-based neighborhood message function (Transformer Encoder model from PyTorch), we vary the number of heads over  $\{2, 4\}$ , and the feed-forward neural network dimension over  $\{64, 128\}$ .

For node-level task datasets, validation is conducted after each training epoch, continuing until either the maximum number of epochs is reached or the optimization metric fails to improve for 50 consecutive validation epochs. The minimum number of epochs is set to 50. Conversely, for graph-level tasks, validation is performed every 5 training epochs, with training halting if the performance metric does not improve on the validation set for the last 10 validation epochs. To optimize the models, `torch.optim.Adam` is combined with `torch.optim.lr_scheduler.StepLR` wherein the step size was set to 50 and the gamma value to 0.5. The optimal hyperparameter set is generally selected based on the best average performance over five validation splits. For the ZINC dataset, five different initialization seeds are used to obtain the average performance.

#### E.4 HARDWARE

The hyperparameter search is executed on a Linux machine with 256 cores, 1TB of system memory, and 8 NVIDIA A100 GPUs, each with 80GB of GPU memory.

## F MODEL SIZE

We provide details on model size for reported results in Section 6.

Table 4: Model size corresponding to results reported in Table 1

| Model                                                        | Graph-Level Tasks |               |               |               |               | Node-Level Tasks |                |                |
|--------------------------------------------------------------|-------------------|---------------|---------------|---------------|---------------|------------------|----------------|----------------|
|                                                              | MUTAG             | PROTEINS      | NCI1          | NCI109        | ZINC          | Cora             | Citeseer       | PubMed         |
| <b>Cellular</b>                                              |                   |               |               |               |               |                  |                |                |
| CCNN (Best Model on TopoBenchmark)                           | 334.72K           | 101.12K       | 63.87K        | 17.67K        | 88.06K        | 451.85K          | 1032.84K       | 163.72K        |
| GCCN $\omega_{\mathcal{N}} = \text{GAT}$                     | 15.11K            | 46.27K        | 68.99K        | 49.63K        | 39.78K        | 341.54K          | 1677.32K       | 344.83K        |
| GCCN $\omega_{\mathcal{N}} = \text{GCN}$                     | 45.44K            | 45.25K        | 65.92K        | 30.69K        | 29.54K        | 801.16K          | 1507.59K       | 443.91K        |
| GCCN $\omega_{\mathcal{N}} = \text{GIN}$                     | <b>63.62K</b>     | 23.49K        | 49.03K        | <b>66.79K</b> | <b>64.35K</b> | 669.58K          | 1674.25K       | 211.97K        |
| GCCN $\omega_{\mathcal{N}} = \text{GraphSAGE}$               | 44.42K            | 76.99K        | <b>47.49K</b> | 115.17K       | 79.71K        | 1195.14K         | 741.5K         | 640.51K        |
| GCCN $\omega_{\mathcal{N}} = \text{Transformer}$             | 112.26K           | 78.79K        | 82.05K        | 115.43K       | 317.02K       | 249.51K          | 468.29K        | 331.59K        |
| GCCN $\omega_{\mathcal{N}} = \text{Best GNN, 1 Hasse graph}$ | 14.98K            | 18.88K        | 18.05K        | 15.91K        | 20.83K        | 150.12K          | 367.88K        | 66.50K         |
| <b>Simplicial</b>                                            |                   |               |               |               |               |                  |                |                |
| CCNN (Best Model on TopoBenchmark)                           | 398.85K           | 10.24K        | 131.84K       | 135.75K       | 617.86K       | 144.62K          | 737.29K        | 134.40K        |
| GCCN $\omega_{\mathcal{N}} = \text{GAT}$                     | 15.11K            | 46.27K        | 68.99K        | 49.63K        | 67.42K        | 341.45K          | 1677.32K       | 344.83K        |
| GCCN $\omega_{\mathcal{N}} = \text{GCN}$                     | 45.44K            | 45.25K        | 65.92K        | 30.69K        | 64.35K        | 801.16K          | 1507.59K       | 443.91K        |
| GCCN $\omega_{\mathcal{N}} = \text{GIN}$                     | 63.62K            | 23.49K        | 49.03K        | 66.79K        | 118.11K       | 669.58K          | 1674.25K       | 211.97K        |
| GCCN $\omega_{\mathcal{N}} = \text{GraphSAGE}$               | 44.42K            | 76.99K        | 47.49K        | 115.17K       | 147.30K       | 1195.14K         | <b>741.51K</b> | 640.51K        |
| GCCN $\omega_{\mathcal{N}} = \text{Transformer}$             | 113.15K           | 213.70K       | 82.05K        | 166.24K       | 148.83K       | 284.58K          | 468.29K        | 331.59K        |
| GCCN $\omega_{\mathcal{N}} = \text{Best GNN, 1 Hasse graph}$ | 19.07K            | 14.66K        | 31.11K        | 15.91K        | 29.54K        | 150.12K          | 367.88K        | 66.50K         |
| <b>Hypergraph</b>                                            |                   |               |               |               |               |                  |                |                |
| CCNN (Best Model on TopoBenchmark)                           | 84.10K            | <b>14.34K</b> | 88.19K        | 88.32K        | 22.53K        | <b>60.26K</b>    | 258.50K        | <b>280.83K</b> |

Table 5: Model sizes corresponding to results in Table 2

| Model                                                                           | MUTAG          | PROTEINS       | NCI1           | NCI109         | Cora           | Citeseer        | PubMed         |
|---------------------------------------------------------------------------------|----------------|----------------|----------------|----------------|----------------|-----------------|----------------|
| <b>SCCN</b>                                                                     |                |                |                |                |                |                 |                |
| TopoBenchmark                                                                   | 398.85K        | 397.31K        | <b>131.84K</b> | <b>135.75K</b> | 155.88K        | 782.34K         | <b>457.99K</b> |
| 1 Hasse graph / $\mathcal{N}$ , $\omega_{\mathcal{N}} = \text{Best(GNN)}$       | <b>852.74K</b> | <b>851.97K</b> | 248.58K        | 291.39K        | <b>159.46K</b> | 791.56K         | 510.47K        |
| 1 Hasse graph for $\{\mathcal{N}\}$ , $\omega_{\mathcal{N}} = \text{Best(GNN)}$ | 104.32K        | 153.09K        | 71.17K         | 54.85K         | 143.66K        | <b>741.51K</b>  | 376.58K        |
| <b>CWN</b>                                                                      |                |                |                |                |                |                 |                |
| TopoBenchmark                                                                   | 334.72K        | <b>101.12K</b> | 124.10K        | 412.29K        | 343.11K        | <b>1754.50K</b> | <b>163.72K</b> |
| 1 Hasse graph / $\mathcal{N}$ , $\omega_{\mathcal{N}} = \text{Best(GNN)}$       | <b>350.46K</b> | 353.54K        | 95.75K         | 465.28K        | 900.23K        | 177.10K         | 159.56K        |
| 1 Hasse graph for $\{\mathcal{N}\}$ , $\omega_{\mathcal{N}} = \text{Best(GNN)}$ | 219.65K        | 283.91K        | <b>78.85K</b>  | <b>264.45K</b> | <b>138.95K</b> | 163.94K         | 138.95K        |

## G MODEL TRAINING TIME

We provide training times for all experiments reported on in Section 6. We measure these training times by running each experiment on a single A30 NVIDIA GPU. We note that these times include the on-the-fly graph expansion method, which slows down the model forward proportionally to dataset size. We plan on moving this process into data preprocessing in the future.

Table 6: Model training time (seconds) corresponding to results reported in Table 1.

| Model                                          | Graph-Level Tasks             |                               |                                |                                |                                  | Node-Level Tasks    |                         |                       |
|------------------------------------------------|-------------------------------|-------------------------------|--------------------------------|--------------------------------|----------------------------------|---------------------|-------------------------|-----------------------|
|                                                | MUTAG ( $\uparrow$ )          | PROTEINS ( $\uparrow$ )       | NCI1 ( $\uparrow$ )            | NCI109 ( $\uparrow$ )          | ZINC ( $\downarrow$ )            | Cora ( $\uparrow$ ) | Citeseer ( $\uparrow$ ) | PubMed ( $\uparrow$ ) |
| <b>Cellular</b>                                |                               |                               |                                |                                |                                  |                     |                         |                       |
| CCNN (Best Model on TopoBenchmark)             | 100 $\pm$ 23                  | 132 $\pm$ 19                  | 238 $\pm$ 89                   | 254 $\pm$ 39                   | 228 $\pm$ 44                     | 75 $\pm$ 15         | 57 $\pm$ 4.4            | 128 $\pm$ 50          |
| GCCN $\omega_N$ = GAT                          | 80 $\pm$ 11                   | 64 $\pm$ 10                   | 778 $\pm$ 118                  | 486 $\pm$ 75                   | 3173 $\pm$ 954                   | 46 $\pm$ 3          | 63 $\pm$ 1              | 202 $\pm$ 22          |
| GCCN $\omega_N$ = GCN                          | 43 $\pm$ 7                    | 67 $\pm$ 16                   | 544 $\pm$ 40                   | 495 $\pm$ 108                  | 4013 $\pm$ 620                   | 46 $\pm$ 4          | 65 $\pm$ 3              | 149 $\pm$ 12          |
| GCCN $\omega_N$ = GIN                          | <b>61 <math>\pm</math> 18</b> | 59 $\pm$ 18                   | 523 $\pm$ 119                  | <b>386 <math>\pm</math> 76</b> | <b>3301 <math>\pm</math> 440</b> | 64 $\pm$ 8          | 77 $\pm$ 2              | 207 $\pm$ 33          |
| GCCN $\omega_N$ = GraphSAGE                    | 43 $\pm$ 12                   | 43 $\pm$ 3                    | <b>691 <math>\pm</math> 80</b> | 364 $\pm$ 102                  | 2863 $\pm$ 262                   | 49 $\pm$ 2          | 60 $\pm$ 3              | 211 $\pm$ 25          |
| GCCN $\omega_N$ = Transformer                  | 50 $\pm$ 19                   | 786 $\pm$ 147                 | 1005 $\pm$ 27                  | 1484 $\pm$ 181                 | 15320 $\pm$ 5386                 | 121 $\pm$ 20        | 94 $\pm$ 20             | 5459 $\pm$ 1374       |
| GCCN $\omega_N$ = Best GNN, 1 Aug. Hasse graph | 33 $\pm$ 7                    | 70 $\pm$ 24                   | 451 $\pm$ 123                  | 441 $\pm$ 130                  | 3162 $\pm$ 340                   | 47 $\pm$ 5          | 72 $\pm$ 6              | 194 $\pm$ 35          |
| <b>Simplicial</b>                              |                               |                               |                                |                                |                                  |                     |                         |                       |
| CCNN (Best Model on TopoBenchmark)             | 123 $\pm$ 57                  | 104 $\pm$ 28                  | 172 $\pm$ 50                   | 183 $\pm$ 62                   | 178 $\pm$ 86                     | 143 $\pm$ 16        | 75 $\pm$ 23             | 114 $\pm$ 18          |
| GCCN $\omega_N$ = GAT                          | 25 $\pm$ 5                    | 70 $\pm$ 17                   | 755 $\pm$ 158                  | 794 $\pm$ 151                  | 2242 $\pm$ 275                   | 49 $\pm$ 3          | 68 $\pm$ 2              | 192 $\pm$ 38          |
| GCCN $\omega_N$ = GCN                          | 40 $\pm$ 7                    | 138 $\pm$ 26                  | 548 $\pm$ 185                  | 603 $\pm$ 181                  | 2428 $\pm$ 833                   | 49 $\pm$ 5          | 67 $\pm$ 2              | 167 $\pm$ 22          |
| GCCN $\omega_N$ = GIN                          | 61 $\pm$ 7                    | 66 $\pm$ 21                   | 904 $\pm$ 180                  | 538 $\pm$ 39                   | 3603 $\pm$ 475                   | 71 $\pm$ 6          | 77 $\pm$ 8              | 210 $\pm$ 42          |
| GCCN $\omega_N$ = GraphSAGE                    | 31 $\pm$ 3                    | 61 $\pm$ 27                   | 572 $\pm$ 124                  | 511 $\pm$ 74                   | 1721 $\pm$ 201                   | 51 $\pm$ 3          | 74 $\pm$ 8              | 221 $\pm$ 37          |
| GCCN $\omega_N$ = Transformer                  | 35 $\pm$ 5                    | 947 $\pm$ 333                 | 1386 $\pm$ 404                 | 1360 $\pm$ 410                 | 7979 $\pm$ 1373                  | 146 $\pm$ 58        | 77 $\pm$ 2              | 5281 $\pm$ 827        |
| GCCN $\omega_N$ = Best GNN, 1 Aug. Hasse graph | 25 $\pm$ 2                    | 78 $\pm$ 27                   | 598 $\pm$ 31                   | 312 $\pm$ 7                    | 2681 $\pm$ 910                   | 52 $\pm$ 4          | 72 $\pm$ 8              | 156 $\pm$ 16          |
| <b>Hypergraph</b>                              |                               |                               |                                |                                |                                  |                     |                         |                       |
| CCNN (Best Model on TopoBenchmark)             | 127 $\pm$ 48                  | <b>96 <math>\pm</math> 20</b> | 220 $\pm$ 74                   | 128 $\pm$ 49                   | 387 $\pm$ 105                    | 121 $\pm$ 38        | 48 $\pm$ 1              | 177 $\pm$ 71          |

Table 7: Model training times (seconds) corresponding to results in Table 2.

| Model                                                   | MUTAG                        | PROTEINS                     | NCI1                            | NCI109                         | Cora                          | Citeseer                       | PubMed                         |
|---------------------------------------------------------|------------------------------|------------------------------|---------------------------------|--------------------------------|-------------------------------|--------------------------------|--------------------------------|
| SCCN Yang et al. (2022)                                 |                              |                              |                                 |                                |                               |                                |                                |
| <b>Benchmark results Telyatnikov et al. (2024)</b>      | 11 $\pm$ 2                   | 60 $\pm$ 18                  | <b>247 <math>\pm</math> 65</b>  | <b>311 <math>\pm</math> 83</b> | 102 $\pm$ 39                  | 101 $\pm$ 41                   | <b>143 <math>\pm</math> 35</b> |
| GCCN, on ensemble of strictly aug. Hasse graphs *2, dig | <b>14 <math>\pm</math> 1</b> | <b>75 <math>\pm</math> 8</b> | 413 $\pm$ 120                   | 298 $\pm$ 15                   | <b>121 <math>\pm</math> 2</b> | 172 $\pm$ 6                    | 285 $\pm$ 20                   |
| GCCN, on 1 aug. Hasse graph *2, dig                     | 5 $\pm$ 1                    | 59 $\pm$ 10                  | 283 $\pm$ 90                    | 217 $\pm$ 100                  | 110 $\pm$ 3                   | <b>166 <math>\pm</math> 10</b> | 376 $\pm$ 27                   |
| CWN Bodnar et al. (2021a)                               |                              |                              |                                 |                                |                               |                                |                                |
| <b>Benchmark results Telyatnikov et al. (2024)</b>      | 11 $\pm$ 2                   | <b>43 <math>\pm</math> 5</b> | 240 $\pm$ 50                    | 252 $\pm$ 92                   | 54 $\pm$ 25                   | <b>52 <math>\pm</math> 5</b>   | <b>119 <math>\pm</math> 14</b> |
| GCCN, on ensemble of strictly aug. Hasse graphs *2, dig | <b>12 <math>\pm</math> 1</b> | 73 $\pm$ 10                  | 536 $\pm$ 38                    | 426 $\pm$ 90                   | 91 $\pm$ 17                   | 49 $\pm$ 1                     | 125 $\pm$ 19                   |
| GCCN, on 1 aug. Hasse graph *2, dig                     | 11 $\pm$ 1                   | 62 $\pm$ 11                  | <b>573 <math>\pm</math> 107</b> | <b>410 <math>\pm</math> 64</b> | <b>96 <math>\pm</math> 2</b>  | 46 $\pm$ 1                     | 130 $\pm$ 20                   |

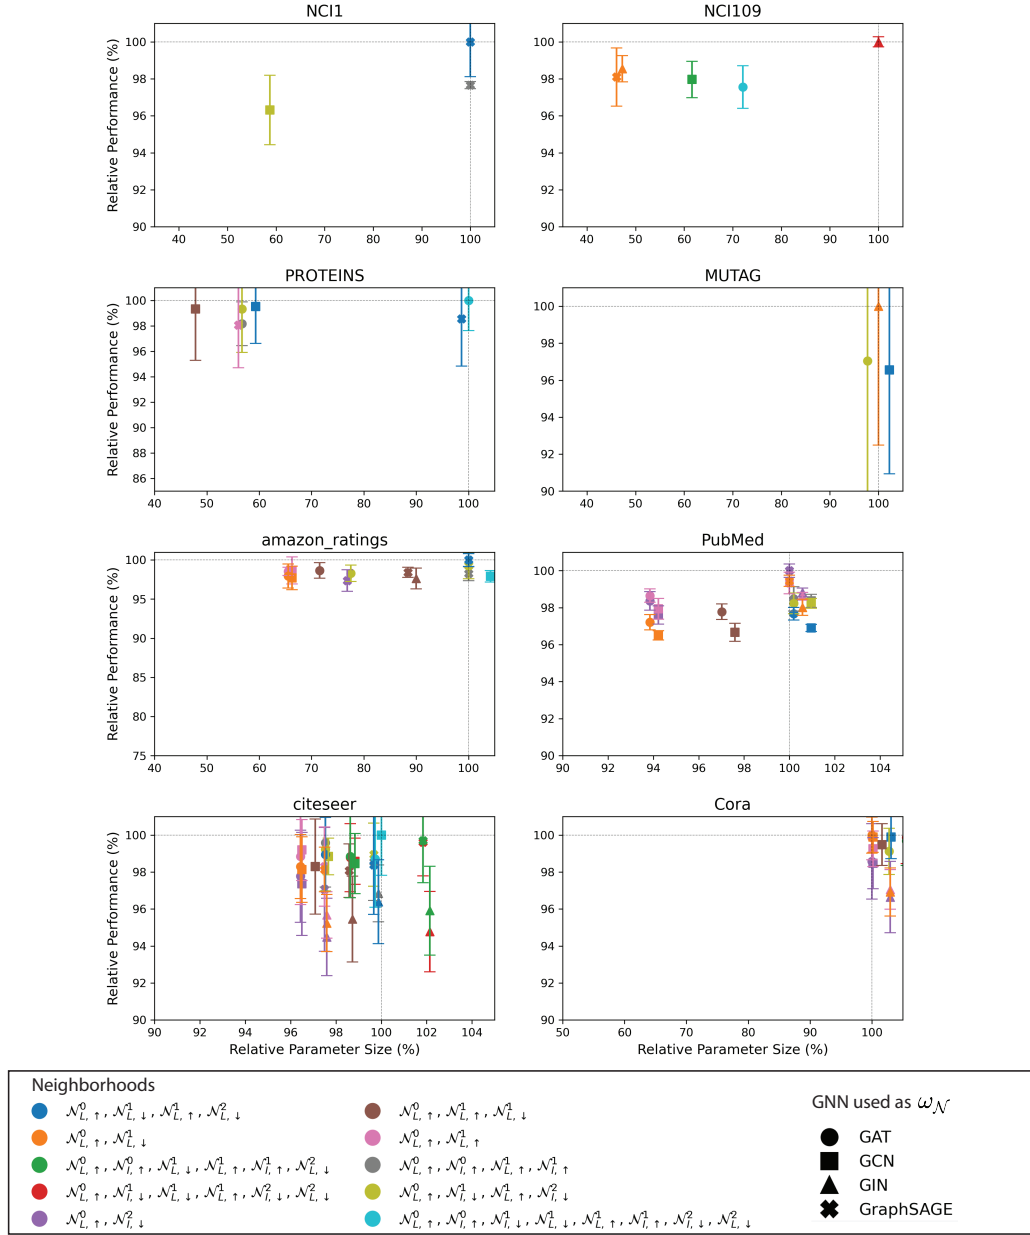

Figure 8: Performance versus size, scaled to best-performing model. The vertical axis range shows models achieving within 10% of the best performance on that dataset.

## H PERFORMANCE VERSUS SIZE COMPLEXITY

We show the plots similar to Fig. 5 for all datasets. Again here, the best model determines the amount of GCCN layers and GNN sublayers we keep constant.

## I ADDITIONAL EXPERIMENTS ON LARGER NODE-LEVEL DATASETS

Table 8 additionally presents the experimental results on 4 heterophilic datasets introduced in Platonov et al. (Amazon Ratings, Roman Empire, Minesweeper, and Questions). These represent larger node-level classification tasks than those shown in the main Table I, with up to 48,921 nodes and 153,540 edges in the case of the Questions graph. Except on this precise dataset, which was not considered in previous TDL literature, we compare the results against CCNNs and hypergraph models from Telyatnikov et al. (2024). We observe that overall GCCNs achieve similar performance than regular CCNNs, and they outperform them by a significant margin on Minesweeper.

|                       | Amazon Ratings                     | Roman Empire                       | Minesweeper                        | Questions        |
|-----------------------|------------------------------------|------------------------------------|------------------------------------|------------------|
| Best GCCN Cell        | 50.17 $\pm$ 0.71                   | 84.48 $\pm$ 0.29                   | 94.02 $\pm$ 0.28                   | 78.04 $\pm$ 1.34 |
| Best CCNN Cell        | <b>51.90 <math>\pm</math> 0.15</b> | 82.14 $\pm$ 0.00                   | 89.42 $\pm$ 0.00                   | -                |
| Best GCCN Simplicial  | 50.53 $\pm$ 0.64                   | 88.24 $\pm$ 0.51                   | <b>94.06 <math>\pm</math> 0.32</b> | 77.43 $\pm$ 1.33 |
| Best CCNN Simplicial  | OOM                                | <b>89.15 <math>\pm</math> 0.32</b> | 90.32 $\pm$ 0.11                   | -                |
| Best Hypergraph Model | 50.50 $\pm$ 0.27                   | 81.01 $\pm$ 0.24                   | 84.52 $\pm$ 0.05                   | -                |

Table 8: Results on larger node level datasets, each experiment run with 5 seeds. We report accuracy for Amazon Ratings and Roman Empire, and AUC-ROC for Minesweeper and Questions. The values for the best CCNNs and hypergraph models are extracted from TopoBenchmark (Telyatnikov et al., 2024).
